# Supplementary material
Source: bioRxiv or medRxiv preprint supplement (https://www.biorxiv.org/highwire/filestream/66262/field_highwire_adjunct_files/1/175810-2.pdf)

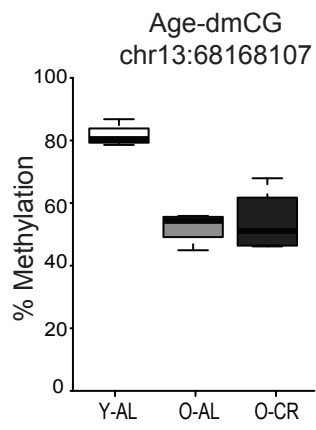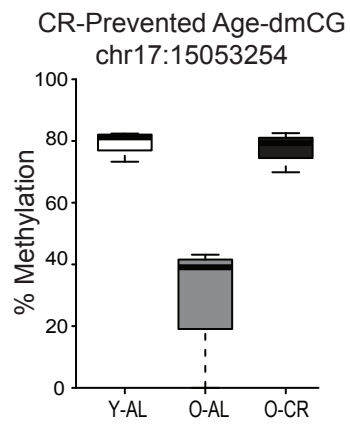

Supplement: Supplementary file [file 175810-2.pdf]
